# Supplementary material
Source: publisher figshare collection journal article supplement (https://acs.figshare.com/ndownloader/files/28909107)
Supplement: Supplementary file 1 [file 28909107]

## Supporting information

# Excellent Deformable Oxide Glass Electrolytes and Oxide-type All-Solid-State Li<sub>2</sub>S-Si Batteries Employing These Electrolytes

Hiroshi Nagata\*, Junji Akimoto

National Institute of Advanced Industrial Science and Technology (AIST), Central 5, 1-1-1 Higashi, Tsukuba, Ibaraki 305-8565, Japan

Corresponding Author \*: Hiroshi Nagata - E-mail: nagata.hiroshi@aist.go.jp

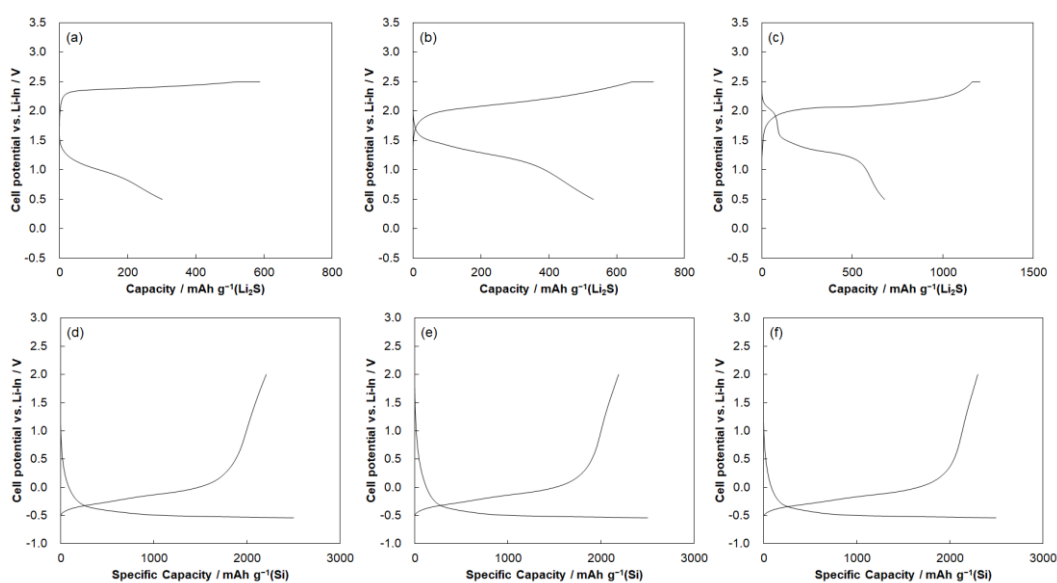

**Figure S1.** First charge–discharge curves of half-battery cells for Li<sub>2</sub>S positive composite electrodes employing 0.60Li<sub>2</sub>SO<sub>4</sub>-0.40Li<sub>2</sub>CO<sub>3</sub> (a), 0.45Li<sub>2</sub>SO<sub>4</sub>-0.30Li<sub>2</sub>CO<sub>3</sub>-0.25LiCl (b), and 0.42Li<sub>2</sub>SO<sub>4</sub>-0.28Li<sub>2</sub>CO<sub>3</sub>-0.30LiI (c) and Si negative negative composite electrodes employing 0.60Li<sub>2</sub>SO<sub>4</sub>-0.40Li<sub>2</sub>CO<sub>3</sub> (d), 0.45Li<sub>2</sub>SO<sub>4</sub>-0.30Li<sub>2</sub>CO<sub>3</sub>-0.25LiCl (e) and 0.45Li<sub>2</sub>SO<sub>4</sub>-0.30Li<sub>2</sub>CO<sub>3</sub>-0.25LiBr (f) at 0.064 mA cm<sup>-2</sup> at 45°C.

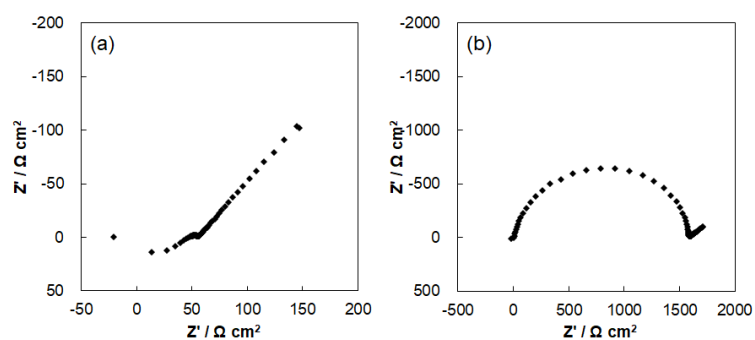

**Figure S2.** Nyquist plots of all-solid-state  $\text{Li}_2\text{S-Si}$  full-battery cells for consisting  $\text{Li}_3\text{PS}_4\text{-LiI}$  (a) or  $0.45\text{Li}_2\text{SO}_4\text{-}0.30\text{Li}_2\text{CO}_3\text{-}0.25\text{LiBr}$  (b) as the SE layer. The AC-impedance data of these full-battery cells were collected from an AC-impedance analyzer (1260A Frequency Response Analyzer, Solartron Analytical) by applying an AC-voltage of 50 mV and a frequency range of 1 Hz to 32 MHz.
